# Supplementary material for: Prognostic Benefit of New Drugs for HFrEF: A Systematic Review and Network Meta-Analysis
Source: MDPI journal article supplement (doi:10.3390/jcm11020348), 2022-01-11

## SUPPLEMENTARY

**Supplementary Table S1 – Risk of bias of individual studies by revised Cochrane Risk Assessment tool**

| Study name                     | Bias arising from the randomization process                                         | Bias due to deviations from intended interventions                                  | Bias due to missing outcome data                                                    | Bias in measurement of the outcome                                                    | Bias in selection of the reported result                                              |
|--------------------------------|-------------------------------------------------------------------------------------|-------------------------------------------------------------------------------------|-------------------------------------------------------------------------------------|---------------------------------------------------------------------------------------|---------------------------------------------------------------------------------------|
| GALACTIC-HF                    |    |    |    |    |    |
| COSMIC-HF                      |    |    |    |    |    |
| VICTORIA                       |    |    |    |    |    |
| SOCRATES-REDUCE                |    |    |    |    |    |
| EMPEROR-Reduced                |    |    |    |    |    |
| EMPERIAL-Reduced               |    |    |    |    |    |
| Empire HF                      |   |   |   |   |   |
| SUGAR-DM-HF                    |  |  |  |  |  |
| EMPA-TROPISM (ATRU-4)          |  |  |  |  |  |
| DAPA-HF                        |  |  |  |  |  |
| DECLARE-TIMI 58 subgroup HFrEF |  |  |  |  |  |
| DEFINE-HF                      |  |  |  |  |  |
| TOTAL                          |  |  |  |  |  |

Each field should be graded as: Low  /High  /Some concerns  (please use the corresponding signs pasting them:   )

### Information at:

<https://methods.cochrane.org/bias/resources/cochrane-risk-bias-tool>

<https://sites.google.com/site/riskofbiastool/welcome/rob-2-0-tool?authuser=0>

<https://sites.google.com/site/riskofbiastool/welcome/rob-2-0-tool/current-version-of-rob-2?authuser=0>

**Supplementary Table S2: League table showing pooled HRs for primary and secondary endpoints (sensitivity analysis – NMA on HR estimates).**

| Endpoint                       | Placebo          | SGLT2i           | Vericiguat       | Omecamtiv mecarbil |
|--------------------------------|------------------|------------------|------------------|--------------------|
| CV death or HF hospitalization | Placebo          | 0.74 (0.67-0.81) | 0.89 (0.82-0.98) | 0.92 (0.86-0.99)   |
|                                | 1.35 (1.23-1.49) | SGLT2i           | 1.21 (1.06-1.38) | 1.25 (1.11-1.40)   |
|                                | 1.12 (1.02-1.23) | 0.83 (0.73-0.94) | Vericiguat       | 1.03 (0.92-1.16)   |
|                                | 1.09 (1.01-1.17) | 0.80 (0.71-0.90) | 0.97 (0.86-1.09) | Omecamtiv mecarbil |
| CV death                       | Placebo          | 0.82 (0.67-0.99) | 0.93 (0.71-1.21) | 1.01 (0.79-1.29)   |
|                                | 1.23 (1.01-1.49) | SGLT2i           | 1.14 (0.82-1.58) | 1.24 (0.90-1.69)   |
|                                | 1.08-0.83-1.40)  | 0.88 (0.63-1.22) | Vericiguat       | 1.09 (0.76-1.56)   |
|                                | 0.99 (0.77-1.27) | 0.81 (0.59-1.11) | 0.92 (0.64-1.32) | Omecamtiv mecarbil |
| All-cause death                | Placebo          | 0.82 (0.69-0.98) | 0.95 (0.74-1.22) | 1.00 (0.79-1.26)   |
|                                | 1.22 (1.02-1.46) | SGLT2i           | 1.16 (0.85-1.57) | 1.22 (0.91-1.64)   |
|                                | 1.05 (0.82-1.35) | 0.86 (0.64-1.17) | Vericiguat       | 1.05 (0.75-1.48)   |
|                                | 1.00 (0.79-1.26) | 0.82 (0.61-1.10) | 0.95 (0.68-1.34) | Omecamtiv mecarbil |
| HF hospitalization             | Placebo          | 0.69 (0.62-0.77) | 0.90 (0.81-1.00) | 0.95 (0.87-1.03)   |
|                                | 1.45 (1.30-1.62) | SGLT2i           | 1.30 (1.12-1.52) | 1.38 (1.20-1.58)   |
|                                | 1.11 (1.00-1.23) | 0.77 (0.66-0.89) | Vericiguat       | 1.06 (0.92-1.21)   |
|                                | 1.05 (0.97-1.15) | 0.73 (0.63-0.84) | 0.95 (0.83-1.08) | Omecamtiv mecarbil |

Values are reported as pooled hazard ratios and 95% confidence intervals. The pooled effect estimates obtained from the network meta-analysis are reported for column intervention relative to raw.

HR = hazard ratio; NMA = network meta-analysis.

**Supplementary Table S3: League table showing pooled risk ratios for primary and secondary endpoints (sensitivity analysis – NMA including phase 3 trials only).**

| Endpoint                       | Placebo          | SGLT2i           | Vericiguat       | Omecamtiv mecarbil |
|--------------------------------|------------------|------------------|------------------|--------------------|
| CV death or HF hospitalization | Placebo          | 0.78 (0.71-0.85) | 0.92 (0.86-0.99) | 0.96 (0.91-1.02)   |
|                                | 1.29 (1.18-1.40) | SGLT2i           | 1.19 (1.06-1.33) | 1.24 (1.12-1.38)   |
|                                | 1.08 (1.01-1.17) | 0.84 (0.75-0.94) | Vericiguat       | 1.05 (0.95-1.15)   |
|                                | 1.04 (0.98-1.09) | 0.81 (0.73-0.89) | 0.96 (0.87-1.05) | Omecamtiv mecarbil |
| CV death                       | Placebo          | 0.87 (0.77-0.99) | 0.94 (0.83-1.06) | 1.01 (0.93-1.10)   |
|                                | 1.15 (1.01-1.30) | SGLT2i           | 1.08 (0.90-1.28) | 1.16 (0.99-1.35)   |
|                                | 1.07 (0.94-1.02) | 0.93 (0.78-1.11) | Vericiguat       | 1.08 (0.93-1.25)   |
|                                | 0.99 (0.91-1.08) | 0.86 (0.74-1.01) | 0.93 (0.80-1.08) | Omecamtiv mecarbil |
| All-cause death                | Placebo          | 0.88 (0.79-0.99) | 0.96 (0.86-1.07) | 1.00 (0.99-1.08)   |
|                                | 1.13 (1.01-1.26) | SGLT2i           | 1.08 (0.93-1.27) | 1.13 (0.99-1.29)   |
|                                | 1.04 (0.94-1.16) | 0.92 (0.79-1.08) | Vericiguat       | 1.04 (0.91-1.19)   |
|                                | 1.00 (0.93-1.08) | 0.88 (0.77-1.01) | 0.96 (0.84-1.09) | Omecamtiv mecarbil |
| HF hospitalization             | Placebo          | 0.72 (0.65-0.81) | 0.92 (0.85-1.01) | 0.97 (0.90-1.04)   |
|                                | 1.38 (1.24-1.54) | SGLT2i           | 1.28 (1.11-1.47) | 1.34 (1.17-1.52)   |
|                                | 1.08 (0.99-1.18) | 0.78 (0.68-0.90) | Vericiguat       | 1.05 (0.94-1.17)   |
|                                | 1.03 (0.97-1.11) | 0.75 (0.66-0.85) | 0.96 (0.86-1.07) | Omecamtiv mecarbil |

Values are reported as pooled risk ratios and 95% confidence intervals. The pooled effect estimates obtained from the network meta-analysis are reported for column intervention relative to raw.

**Supplementary Figure S1: Forest plot summarizing data from individual studies for primary endpoint (main analysis).**

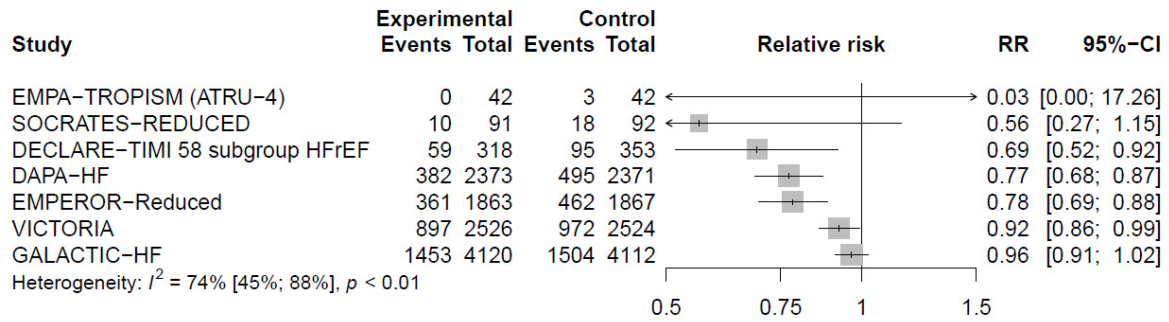

**Supplementary Figure S2: Forest plot of each treatment versus PLACEBO for primary endpoint (main analysis).**

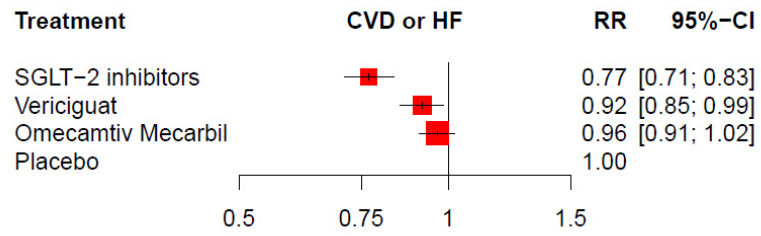

**Supplementary Figure S3: Cumulative probability rank plots for each treatment being the best with respect to primary endpoint (main analysis).**

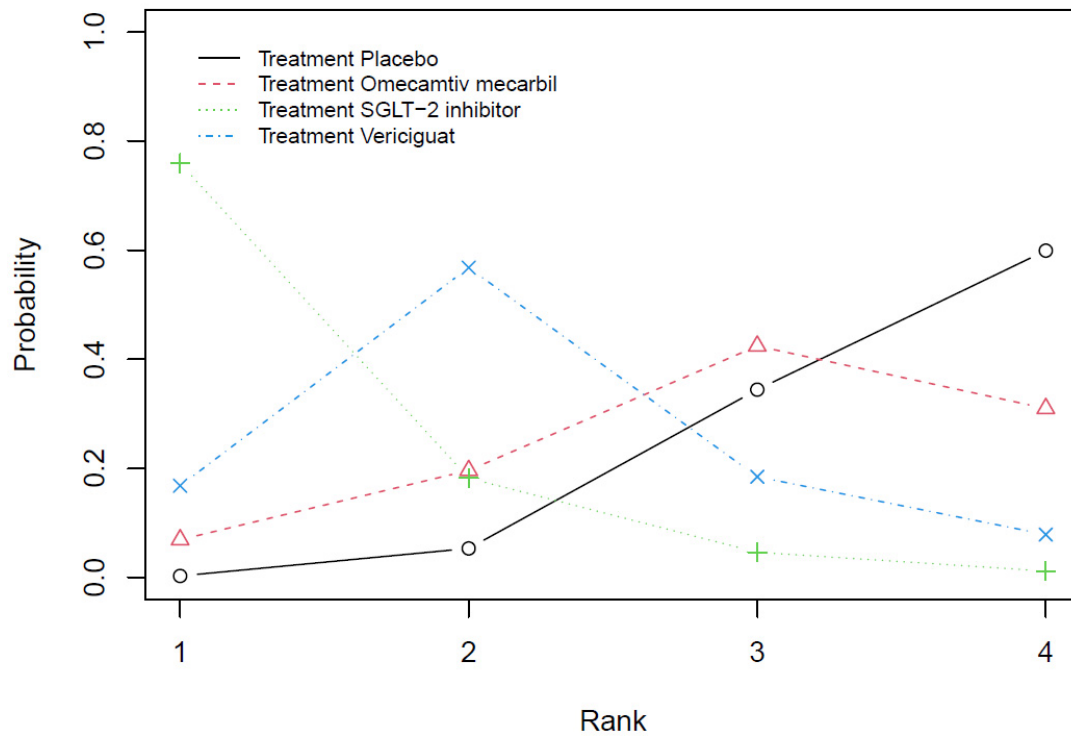

**Supplementary Figure S4: Forest plot summarizing data from individual studies for CV death (main analysis).**

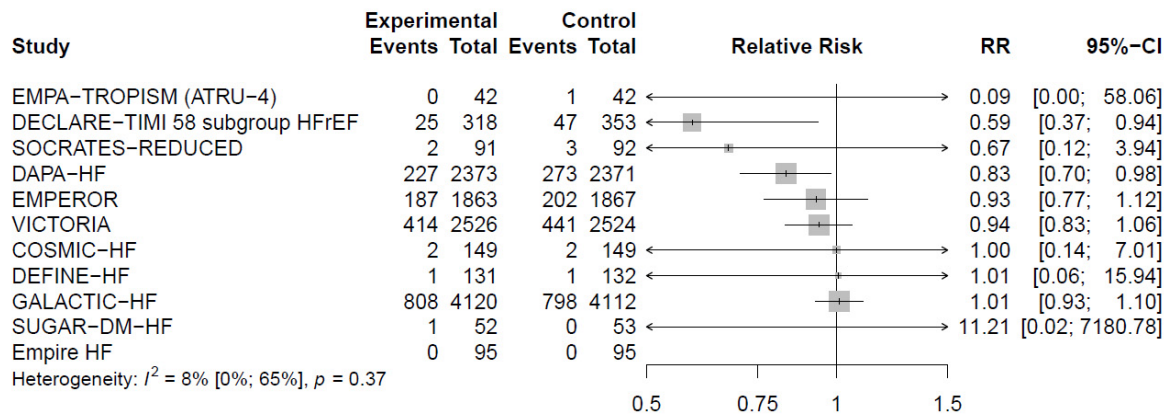

**Supplementary Figure S5: Forest plot of each treatment versus PLACEBO for CV death (main analysis).**

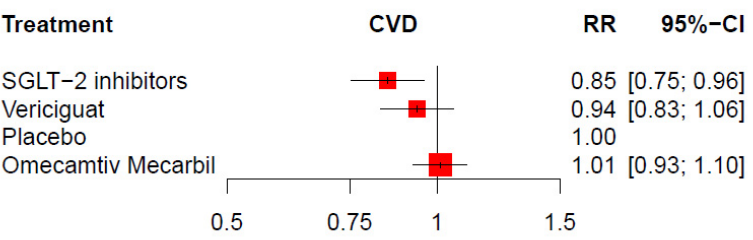



**Supplementary Figure S6: Cumulative probability rank plots for each treatment being the best with respect to CV death (main analysis).**

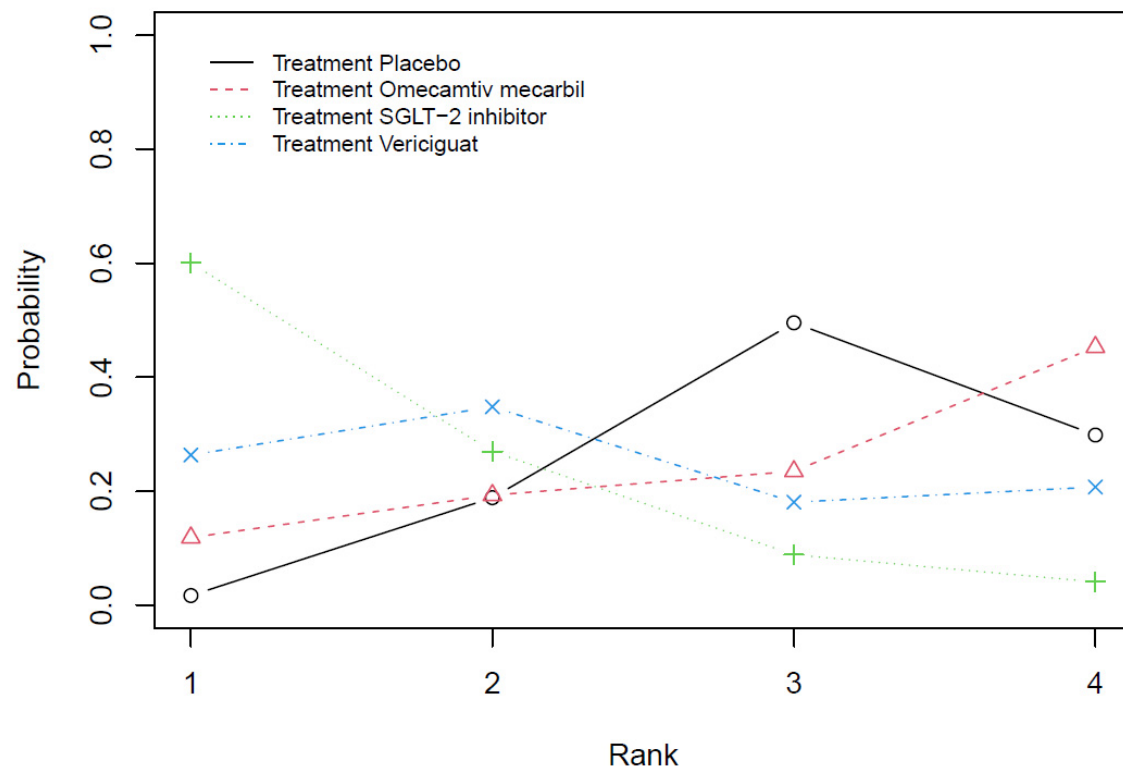

**Supplementary Figure S7: Forest plot summarizing data from individual studies for all-cause death (main analysis).**

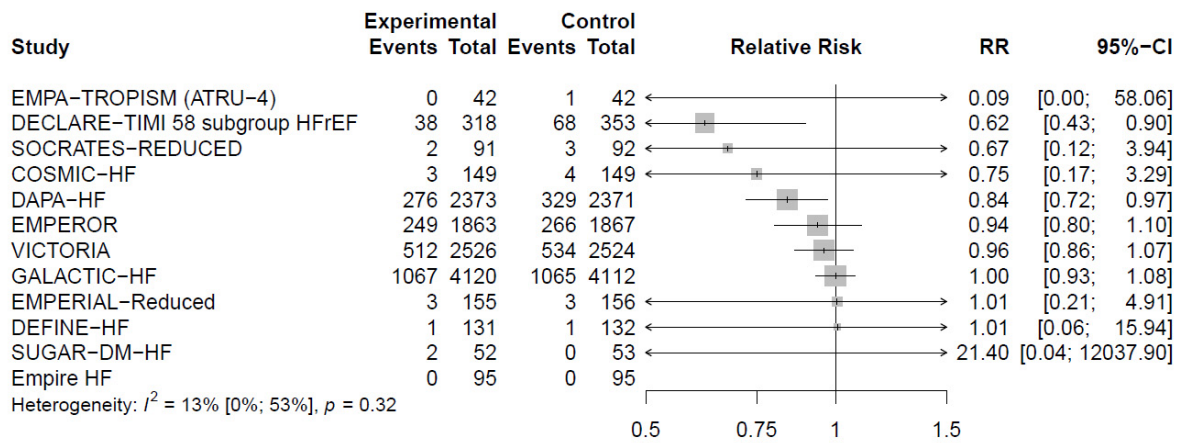

**Supplementary Figure S8: Forest plot of each treatment versus PLACEBO for all-cause death (main analysis).**

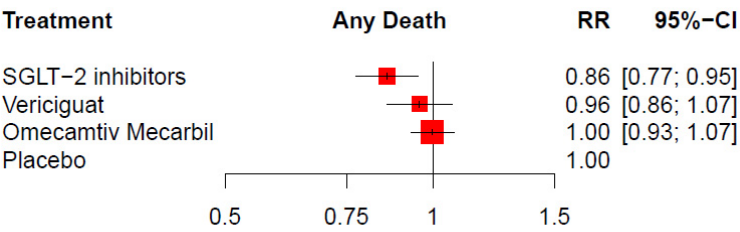

**Supplementary Figure S9: Cumulative probability rank plots for each treatment being the best with respect to all-cause death (main analysis).**

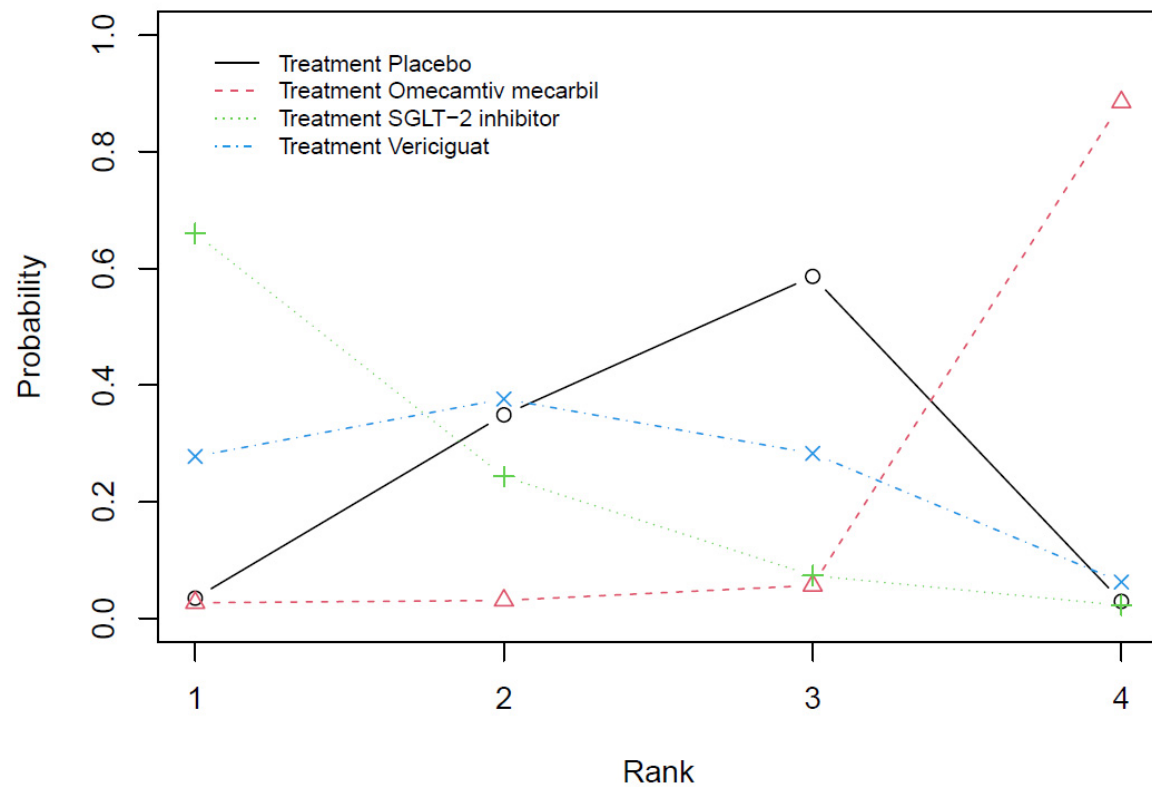

**Supplementary Figure S10: Forest plot summarizing data from individual studies for HF hospitalization (main analysis).**

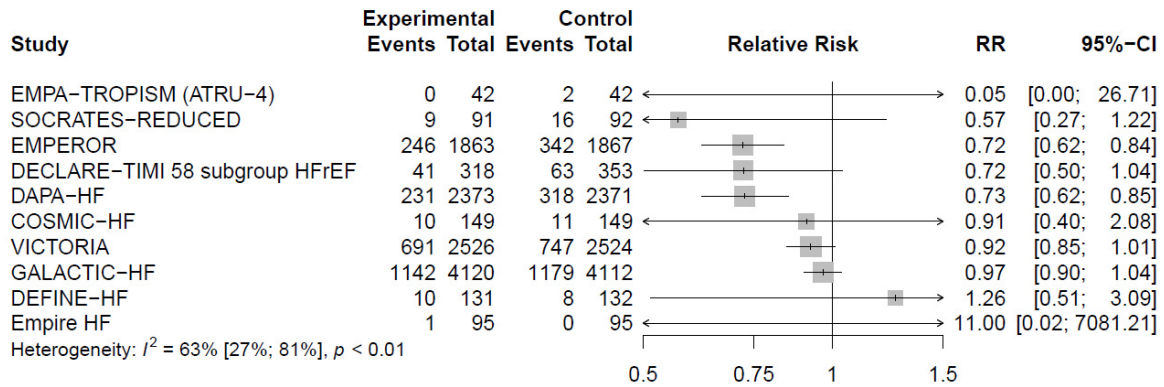

**Supplementary Figure S11: Forest plot of each treatment versus PLACEBO for HF hospitalization (main analysis).**

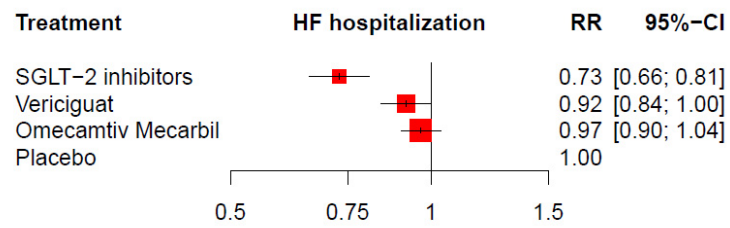

**Supplementary Figure S12: Cumulative probability rank plots for each treatment being the best with respect to HF hospitalization (main analysis).**

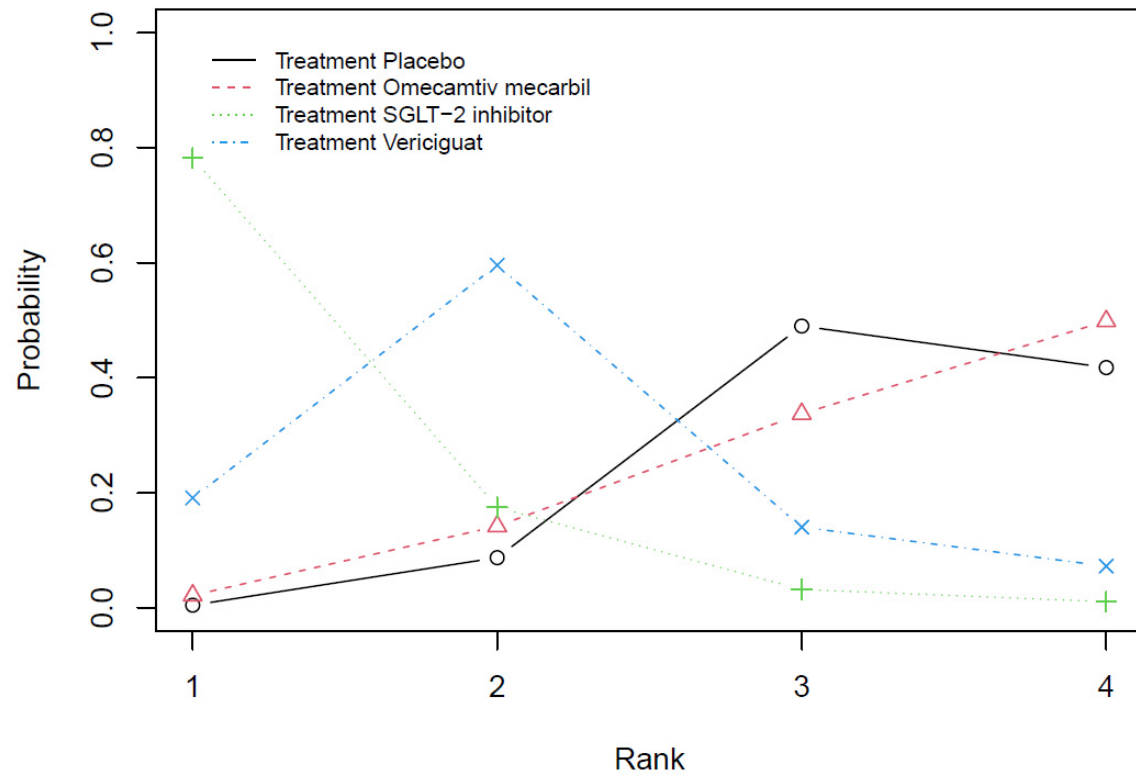

**Supplementary Figure S13: Forest plot of each treatment versus PLACEBO for primary endpoint (sensitivity analysis – NMA on HR estimates).**

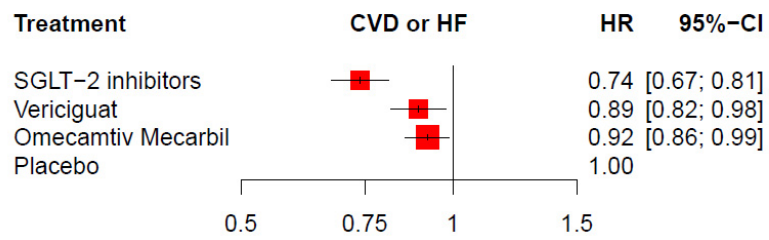



**Supplementary Figure S14: Forest plot of each treatment versus PLACEBO for primary endpoint (sensitivity analysis – NMA including phase 3 trials only).**

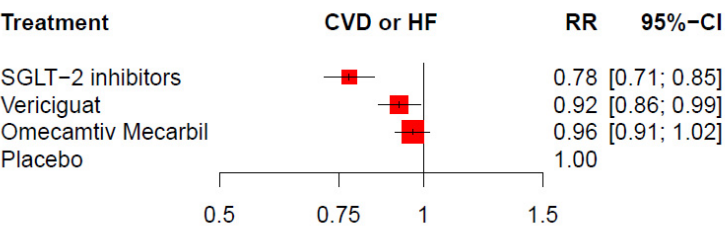

Supplement: s1 [file s1]
